# Supplementary material
Source: PubMed Central journal article supplement (PMC2880174)
Supplement: NIHMS203338-supplement-Supplemental_Figure_legends.pdf [file NIHMS203338-supplement-Supplemental_Figure_legends.pdf]

**Fig S1. A Western blot showing that a goat anti-ATF5 antibody (Abcam) recognizes the 22 kd endogenous ATF5 expressed in C6 cell.** Lane 1: 100 µg whole cell extract; Lane 2: Supernatant of the Anti-ATF5-agarose-beads-depleted whole cell extract (100 µg); Lane 3: Pellet of the Anti-ATF5-agarose-beads IP. Protein markers and protein bands corresponding to ATF5 and immunoglobulin light and heavy chains are labeled.

**Fig S2. Response of ATF5CON-bearing luciferase reporter to increasing amount of ATF5.** Luciferase reporter assays were performed as in Fig 4A except that different amounts of ATF5 construct DNA were used.

**Fig S3. Expression of ATF5 in C6 cells subject to serum withdrawal.** Cell extracts were made from cells transfected and treated as in Fig 5C except that they were produced 48 h after serum withdrawal. Western blotting was carried out using an antibody against ATF5 as in Fig 1B. Blot was stripped and re-probed with an antibody against β-actin, showing equal loading.

**Fig S4. Response of Egr-1P- and mEgr-1P-bearing luciferase reporters to increasing amount of ATF5.** Luciferase reporter assays were performed as in Fig S2 except that Egr-1P and mEgr-1P luciferase reporters were being tested.

**Table S1. List of genes whose promoters contain sequence that matches the ATF5 consensus DNA regulatory site.**
