# Supplementary material
Source: PubMed Central journal article supplement (PMC2880174)
Supplement: NIHMS203338-supplement-Supplemental_Table_1.pdf [file NIHMS203338-supplement-Supplemental_Table_1.pdf]

## Supplemental Table 1

### Potential ATF5-responsive genes identified by a search for genes whose promoter contains ATF5CON

| Gene          | Accession    | Location                 |
|---------------|--------------|--------------------------|
| Pex7          | NM_001034147 | chr1:15163734-15165734   |
| Exoc3         | NM_001024964 | chr1:29895535-29897535   |
| V1re26        | NM_001008903 | chr1:57121857-57123857   |
| V1rf4         | NM_001009522 | chr1:58679804-58681804   |
| Olr1_predicte | NM_001000538 | chr1:64219105-64221105   |
| Zfp110        | NM_001024775 | chr1:72733177-72735177   |
| Yif1b         | NM_198734    | chr1:84371709-84373709   |
| Yif1b         | NM_001014810 | chr1:84371884-84373884   |
| Rpl13a        | NM_173340    | chr1:95603504-95605504   |
| Cd37          | NM_017124    | chr1:95715116-95717116   |
| Gucy2d        | NM_130737    | chr1:155711464-155713464 |
| Neu3          | NM_054010    | chr1:157183064-157185064 |
| Olr43_predict | NM_001000541 | chr1:160206358-160208358 |
| Olr125_predic | NM_001000740 | chr1:161507495-161509495 |
| Olr178_predic | NM_001000179 | chr1:162679197-162681197 |
| Olr189_predic | NM_001000184 | chr1:162841035-162843035 |
| Igsf6         | NM_133542    | chr1:179922158-179924158 |
| Cdipt         | NM_138899    | chr1:186151277-186153277 |
| Tial1         | NM_001013193 | chr1:187706035-187708035 |
| GalNAc4S6S`   | NM_173310    | chr1:191737958-191739958 |
| Olr288_predic | NM_001000231 | chr1:200029923-200031923 |
| Olr289_predic | NM_001000767 | chr1:200217945-200219945 |
| Tspan4        | NM_001013070 | chr1:201659390-201661390 |
| Shank2        | NM_201350    | chr1:204397855-204399855 |
| Shank2        | NM_133441    | chr1:204584362-204586362 |
| MGC125034     | NM_001033901 | chr1:211627024-211629024 |
| Anxa1         | NM_012904    | chr1:223494455-223496455 |
| Cdc37l1       | NM_001011941 | chr1:232622608-232624608 |
| Ch25h         | NM_001025415 | chr1:238458335-238460335 |
| Pi4k2a        | NM_053735    | chr1:248760679-248762679 |
| Btrc          | NM_001007148 | chr1:250527173-250529173 |
| Ins1          | NM_019129    | chr1:257999133-258001133 |

|                |              |                           |
|----------------|--------------|---------------------------|
| Skp1a          | NM_001007608 | chr10:37663416-37665416   |
| Olr1457_pred   | NM_001000526 | chr10:45036068-45038068   |
| Atp1b2         | NM_012507    | chr10:56424465-56426465   |
| Eif4a1         | NM_199372    | chr10:56489739-56491739   |
| LOC497940      | NM_001017476 | chr10:56744790-56746790   |
| LOC501706      | NM_001047972 | chr10:57925345-57927345   |
| Ccl2           | NM_031530    | chr10:70254262-70256262   |
| LOC363658      | NM_001014228 | chr10:70983711-70985711   |
| RGD1306819     | NM_001013860 | chr10:74962413-74964413   |
| Pdk2           | NM_030872    | chr10:83724973-83726973   |
| Ppp1r1b        | NM_138521    | chr10:87119888-87121888   |
| Ka26           | NM_001008818 | chr10:89025644-89027644   |
| Ramp2          | NM_031646    | chr10:90273462-90275462   |
| Dnai2          | NM_001007726 | chr10:104604687-104606687 |
| Nploc4         | NM_080577    | chr10:109847709-109849709 |
| MGC95208       | NM_001005552 | chr11:2104839-2106839     |
| Hspa8          | NM_024351    | chr11:5432456-5434456     |
| Grik1          | NM_017241    | chr11:28106450-28108450   |
| Olr1538_pred   | NM_001000530 | chr11:41966261-41968261   |
| Olr1561_pred   | NM_001000048 | chr11:42450669-42452669   |
| Gsk3b          | NM_032080    | chr11:64428698-64430698   |
| Rpl35a         | NM_021264    | chr11:69552236-69554236   |
| Camk2n2        | NM_021678    | chr11:82517330-82519330   |
| Aprin_predictr | NM_001101805 | chr12:4128352-4130352     |
| Aprin_predictr | NM_001102383 | chr12:4128352-4130352     |
| Kiaa0415       | NM_001037220 | chr12:12505621-12507621   |
| MGC116363      | NM_001025760 | chr12:17528382-17530382   |
| Por            | NM_031576    | chr12:22154339-22156339   |
| Eif2b1         | NM_172029    | chr12:33136322-33138322   |
| LOC360807      | NM_001014128 | chr12:33975382-33977382   |
| RGD1305685     | NM_001047900 | chr12:36286678-36288678   |
| Rnf10          | NM_001011904 | chr12:42607878-42609878   |
| Cabp1          | NM_001033675 | chr12:42702846-42704846   |
| Cabp1          | NM_133529    | chr12:42702846-42704846   |
| Git2           | NM_001005553 | chr12:43115705-43117705   |
| Stx6           | NM_031665    | chr13:70119863-70121863   |
| Fmo4           | NM_144562    | chr13:78493198-78495198   |

|              |              |                           |
|--------------|--------------|---------------------------|
| Fmo4         | NM_144561    | chr13:78494458-78496458   |
| Prrx1        | NM_153821    | chr13:79028881-79030881   |
| Rgs7         | NM_019343    | chr13:91211520-91213520   |
| Lrrc8c       | NM_001037179 | chr14:5393820-5395820     |
| Art3         | NM_001012034 | chr14:17280642-17282642   |
| Cdkl2        | NM_001012035 | chr14:17596861-17598861   |
| VCS-beta1    | NM_001017497 | chr14:21578852-21580852   |
| Bst1         | NM_030848    | chr14:72414498-72416498   |
| Rab28        | NM_053978    | chr14:74399540-74401540   |
| Tacc3        | NM_001004424 | chr14:82760864-82762864   |
| RGD1307937   | NM_001013877 | chr14:110559608-110561608 |
| Rtn4         | NM_031831    | chr14:110723088-110725088 |
| Olr1630_pred | NM_001000092 | chr15:26560906-26562906   |
| Slc7a7       | NM_031341    | chr15:32471526-32473526   |
| Gzmb         | NM_138517    | chr15:35198466-35200466   |
| Mipep        | NM_031052    | chr15:39869328-39871328   |
| Ghitm        | NM_001005908 | chr16:13338420-13340420   |
| Rab8a        | NM_053998    | chr16:18089591-18091591   |
| RGD1306802   | NM_001024772 | chr16:24564544-24566544   |
| RGD1307325   | NM_001014001 | chr16:49404995-49406995   |
| Ap3m2        | NM_133305    | chr16:73685442-73687442   |
| Irx2         | NM_001039505 | chr17:748950-750950       |
| RGD1304696   | NM_001024998 | chr17:14950842-14952842   |
| LOC361237    | NM_001014145 | chr17:35517646-35519646   |
| Dnmt2        | NM_001031643 | chr17:87824484-87826484   |
| Usp14        | NM_001008301 | chr18:1330478-1332478     |
| Gypc         | NM_001013233 | chr18:25006999-25008999   |
| Camk4        | NM_012727    | chr18:25404409-25406409   |
| Egr1         | NM_012551    | chr18:27341918-27343918   |
| Pcdhga8      | NM_001037156 | chr18:30633032-30635032   |
| Commd10      | NM_001004276 | chr18:41224868-41226868   |
| Dcc          | NM_012841    | chr18:69140741-69142741   |
| Smad4        | NM_019275    | chr18:70461541-70463541   |
| MAST1        | NM_181089    | chr19:24870708-24872708   |
| Pkn1         | NM_017175    | chr19:26130552-26132552   |
| Rnf166       | NM_001002279 | chr19:52765658-52767658   |
| Hmgcs1       | NM_017268    | chr2:51735089-51737089    |

|               |              |                          |
|---------------|--------------|--------------------------|
| Osmr          | NM_001005384 | chr2:56121463-56123463   |
| Ghsr          | NM_032075    | chr2:113267622-113269622 |
| Gpr160        | NM_001025147 | chr2:116961732-116963732 |
| Mynn          | NM_001012178 | chr2:117215148-117217148 |
| Selt          | NM_001014253 | chr2:147911244-147913244 |
| Ntrk1         | NM_021589    | chr2:179855545-179857545 |
| Cct3          | NM_199091    | chr2:180379043-180381043 |
| LOC310665     | NM_001025118 | chr2:190196814-190198814 |
| Vtcn1         | NM_001024244 | chr2:195872347-195874347 |
| Rtcd1         | NM_001004227 | chr2:212754018-212756018 |
| RGD1312003    | NM_001014176 | chr2:217873423-217875423 |
| Camk2d        | NM_012519    | chr2:223838649-223840649 |
| Trim10        | NM_001009176 | chr20:1790921-1792921    |
| C4-2          | NM_001002805 | chr20:4104164-4106164    |
| C4a           | NM_031504    | chr20:4104164-4106164    |
| C4-2          | NM_001002805 | chr20:4298723-4300723    |
| Btnl8         | NM_212489    | chr20:4401711-4403711    |
| Btnl7         | NM_212488    | chr20:4435292-4437292    |
| Daxx          | NM_080891    | chr20:5126648-5128648    |
| Rnf8          | NM_001025727 | chr20:7927801-7929801    |
| Glo1          | NM_207594    | chr20:8919001-8921001    |
| LOC685005     | NM_001101011 | chr20:9949156-9951156    |
| Ndufv3l       | NM_022607    | chr20:9949189-9951189    |
| Pspn          | NM_013014    | chrUn:24761982-24763982  |
| Gucy1a2       | NM_023956    | chrUn:47455663-47457663  |
| LOC313450     | NM_001014791 | chrX:7726299-7728299     |
| Ebp           | NM_057137    | chrX:26329198-26331198   |
| Pcsk1n        | NM_019279    | chrX:26618027-26620027   |
| Tnmd          | NM_022290    | chrX:121394740-121396740 |
| Fut7          | NM_199491    | chr3:3588173-3590173     |
| Cmya3         | NM_201989    | chr3:49412868-49414868   |
| Prg2          | NM_031619    | chr3:68207730-68209730   |
| Olr601_predic | NM_001000512 | chr3:71715492-71717492   |
| Olr670_predic | NM_001000633 | chr3:73204873-73206873   |
| Olr733_predic | NM_001000618 | chr3:74534053-74536053   |
| Olr734_predic | NM_001000617 | chr3:74543081-74545081   |
| Nr1h3         | NM_031627    | chr3:75550793-75552793   |

|               |              |                          |
|---------------|--------------|--------------------------|
| Gylt1b        | NM_199107    | chr3:76768638-76770638   |
| Cd59          | NM_012925    | chr3:89241598-89243598   |
| Cd59          | NM_012925    | chr3:89241598-89243598   |
| Olr757_predic | NM_001000613 | chr3:97007537-97009537   |
| Snap25        | NM_030991    | chr3:124804604-124806604 |
| Defb23        | NM_001037518 | chr3:142784338-142786338 |
| Gss           | NM_012962    | chr3:146087820-146089820 |
| Src           | NM_031977    | chr3:148155255-148157255 |
| Mterf         | NM_053499    | chr4:26940112-26942112   |
| LOC500060     | NM_001024323 | chr4:56151396-56153396   |
| Mkln1         | NM_031359    | chr4:58473701-58475701   |
| RGD1560602    | NM_001025149 | chr4:68042937-68044937   |
| Prss2         | NM_012729    | chr4:69086287-69088287   |
| Trpv5         | NM_053787    | chr4:69387346-69389346   |
| Dok1          | NM_001025416 | chr4:117245209-117247209 |
| RGD1562258    | NM_001048233 | chr4:117337055-117339055 |
| Pom210        | NM_053322    | chr4:125285493-125287493 |
| LOC502872     | NM_001044272 | chr4:149212685-149214685 |
| Sec13l1       | NM_001006978 | chr4:149650449-149652449 |
| Ninj2         | NM_021595    | chr4:156472780-156474780 |
| Ccnd2         | NM_022267    | chr4:163546501-163548501 |
| RGD1562831    | NM_001085402 | chr4:165820500-165822500 |
| Ocil          | NM_130402    | chr4:165996312-165998312 |
| Ldhb          | NM_012595    | chr4:180079473-180081473 |
| Bcat1         | NM_017253    | chr4:182692917-182694917 |
| Col27a1       | NM_198747    | chr5:80196077-80198077   |
| lft74         | NM_001007001 | chr5:114911346-114913346 |
| Olr869_predic | NM_001000413 | chr5:139463330-139465330 |
| RGD1306186    | NM_001024986 | chr5:162599694-162601694 |
| Mfn2          | NM_130894    | chr5:164980763-164982763 |
| Mxra8         | NM_001007002 | chr5:172696248-172698248 |
| Kif3c         | NM_053486    | chr6:26340387-26342387   |
| Cpsf3         | NM_001030030 | chr6:41842970-41844970   |
| Slc26a4       | NM_019214    | chr6:49427000-49429000   |
| Zfp361        | NM_017172    | chr6:103124576-103126576 |
| Pnma1         | NM_130820    | chr6:108200396-108202396 |
| LOC500712     | NM_001047961 | chr6:128324554-128326554 |

|               |              |                          |
|---------------|--------------|--------------------------|
| LOC246266     | NM_144750    | chr6:136907406-136909406 |
| Sp4           | NM_012761    | chr6:145613957-145615957 |
| LOC500761     | NM_001024351 | chr7:1560514-1562514     |
| Olr892_predic | NM_001000060 | chr7:3232218-3234218     |
| Atcay_predict | NM_001040190 | chr7:9969562-9971562     |
| Geft          | NM_199395    | chr7:67144481-67146481   |
| Ptdss1        | NM_001012113 | chr7:67986401-67988401   |
| Azin1         | NM_022585    | chr7:74189447-74191447   |
| Baalc         | NM_144762    | chr7:74424266-74426266   |
| Ptk2          | NM_013081    | chr7:111084554-111086554 |
| Ly6b          | NM_139257    | chr7:113310996-113312996 |
| Plec1         | NM_022401    | chr7:114237725-114239725 |
| Rac2          | NM_001008384 | chr7:116532482-116534482 |
| Pla2g6        | NM_001005560 | chr7:117307172-117309172 |
| Cbx7          | NM_199117    | chr7:118165701-118167701 |
| LOC245960     | NM_139101    | chr7:128611368-128613368 |
| Prph1         | NM_012633    | chr7:137834164-137836164 |
| Kcnh3         | NM_017108    | chr7:137982617-137984617 |
| Kcnh3         | NM_017108    | chr7:137982617-137984617 |
| Kb20          | NM_001008815 | chr7:140115890-140117890 |
| Kb26          | NM_001008810 | chr7:140220554-140222554 |
| Kb2           | NM_001008899 | chr7:140507590-140509590 |
| Casp1         | NM_012762    | chr8:2025975-2027975     |
| Fbxl12        | NM_001025700 | chr8:19661560-19663560   |
| Fli1          | NM_001017381 | chr8:32309782-32311782   |
| Olr1232_pred  | NM_001000445 | chr8:40510608-40512608   |
| Olr1338_pred  | NM_001000789 | chr8:43009719-43011719   |
| Cd3g          | NM_001077646 | chr8:47930550-47932550   |
| Dapk2         | NM_001013109 | chr8:70537830-70539830   |
| Rbp1          | NM_012733    | chr8:103603869-103605869 |
| Timm8a        | NM_053370    | chr8:112004782-112006782 |
| Rassf1        | NM_001037555 | chr8:112796862-112798862 |
| Trex1         | NM_001024989 | chr8:114072510-114074510 |
| Myd88         | NM_198130    | chr8:124303798-124305798 |
| Trfp          | NM_001013178 | chr9:8851810-8853810     |
| Mrps18a       | NM_198756    | chr9:10435570-10437570   |
| Il1r2         | NM_053953    | chr9:39277396-39279396   |

|        |              |                          |
|--------|--------------|--------------------------|
| Il1r2  | NM_053953    | chr9:39277396-39279396   |
| Slc4a3 | NM_017049    | chr9:74821768-74823768   |
| Mrpl44 | NM_001031650 | chr9:79071325-79073325   |
| Ugt1a2 | NM_201423    | chr9:87079131-87081131   |
| Efna5  | NM_053903    | chr9:101532696-101534696 |
