# Supplementary material
Source: PubMed Central journal article supplement (PMC2880174)

## Supplemental Figure S1

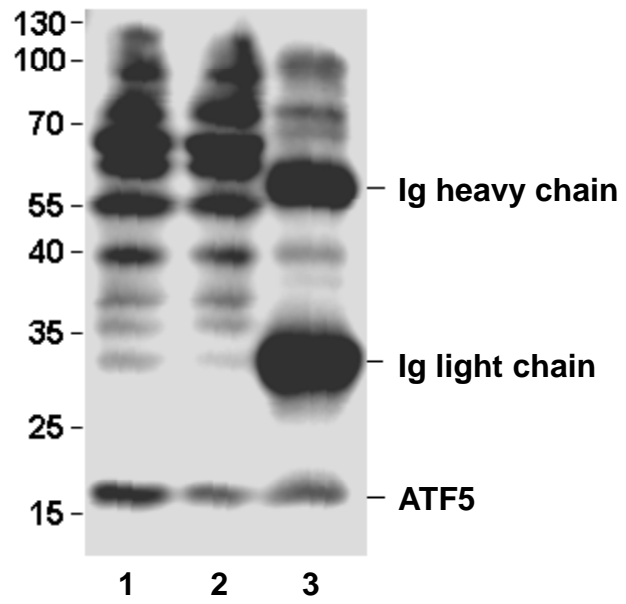

## Supplemental Figure S2

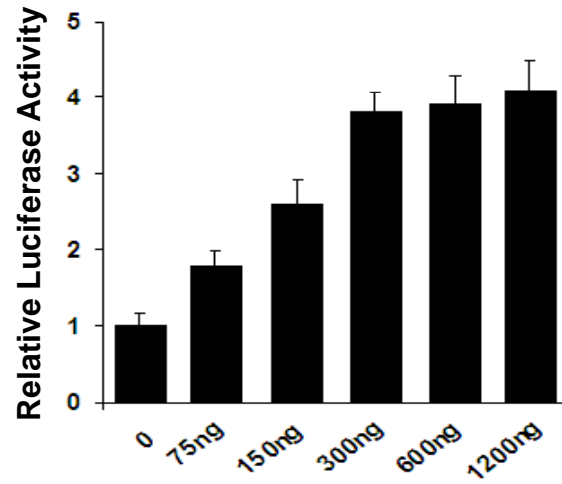

## Supplemental Figure S3

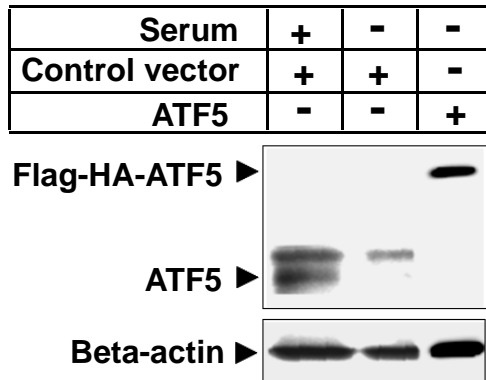

# Supplemental Figure S4

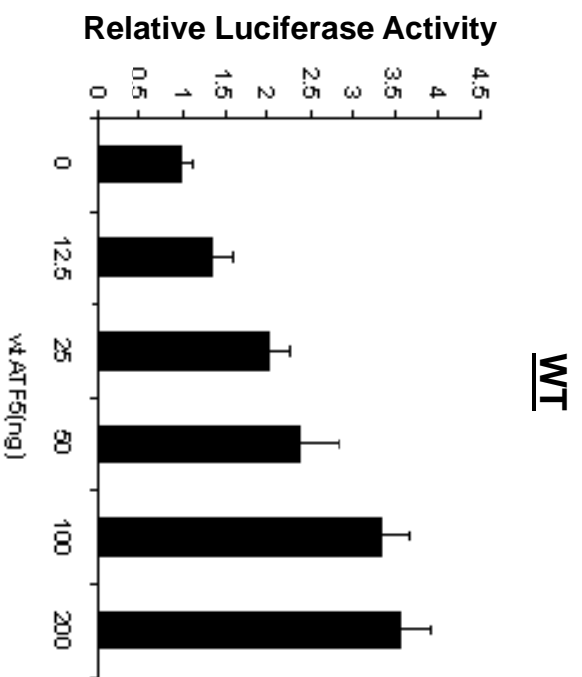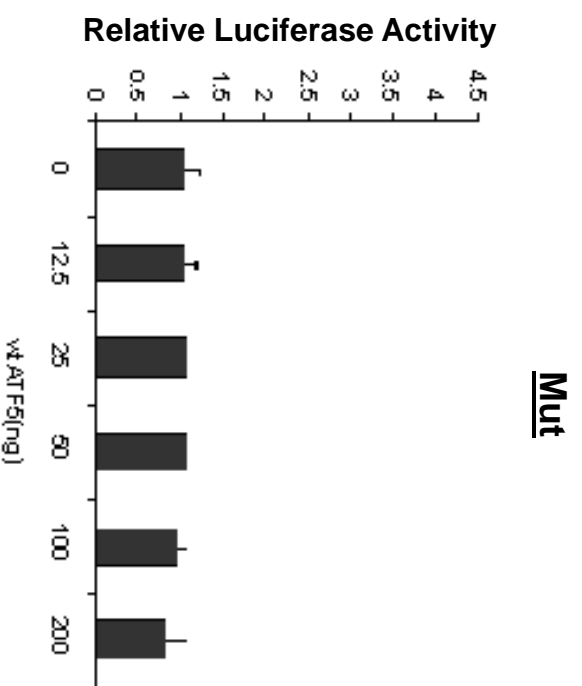

Supplement: NIHMS203338-supplement-Supplemental_Figures.pdf [file NIHMS203338-supplement-Supplemental_Figures.pdf]
